# Supplementary material
Source: PubMed Central journal article supplement (PMC4793991)
Supplement: dums022733.ww2_default.pdf [file dums022733.ww2_default.pdf]

Index condition

Interacting drugs recommended by any of the 12 guidelines

| Depression                                                                    | Aspirin | Warfarin | NSAID | Dabigatran | Clopidogrel | Alpha blocker | Theophylline | ARB | Ace Inhibitor | Diuretics | Lithium | Bupropion | codeine/dihydrocodeine | MAOI | Moclobemide | Tramadol | TCA | Antipsychotic | Erythromycin | Amiodarone | Flecainide | Propafenone | Sotalol |
|-------------------------------------------------------------------------------|---------|----------|-------|------------|-------------|---------------|--------------|-----|---------------|-----------|---------|-----------|------------------------|------|-------------|----------|-----|---------------|--------------|------------|------------|-------------|---------|
| SSRI                                                                          | B       | B        | B     | B          | B           |               | P            |     |               |           | P       |           |                        | CNS  | CNS         | CNS      | VA  | VA            |              |            |            |             |         |
| Venlafaxine                                                                   | B       | B        | B     | B          |             |               |              |     |               |           |         |           |                        | CNS  | CNS         |          |     | VA            |              |            |            |             |         |
| Mirtazapine                                                                   |         |          |       |            |             |               |              |     |               |           |         |           |                        | CNS  | CNS         |          |     |               |              |            |            |             |         |
| Duloxetine                                                                    |         |          |       | B          |             |               |              |     |               |           |         |           |                        | CNS  | CNS         |          |     |               |              |            |            |             |         |
| Reboxetine                                                                    |         |          |       |            |             |               |              |     |               |           |         |           |                        | CNS  |             |          |     |               |              |            |            |             |         |
| Flupentixol                                                                   |         |          |       |            |             |               |              |     |               |           |         |           |                        |      |             |          |     |               |              |            |            |             |         |
| Tryptophan                                                                    |         |          |       |            |             |               |              |     |               |           |         |           |                        | CNS  |             |          |     |               |              |            |            |             |         |
| TCA                                                                           |         | B        |       |            |             |               |              |     |               |           |         |           |                        | CNS  | CNS         | CNS      |     | VA            |              | VA         | VA         | VA          | VA      |
| MAOI                                                                          |         |          |       |            |             | BP            |              |     |               |           |         |           |                        | CNS  | CNS         | CNS      | CNS | CNS           |              |            |            |             |         |
| Moclobemide                                                                   |         |          |       |            | B           |               |              |     |               |           |         |           |                        | CNS  | CNS         | CNS      |     | CNS           |              |            |            |             |         |
| Lithium                                                                       |         |          | P     |            |             |               |              | P   | P             | P         |         |           |                        |      |             |          |     |               |              | VA         |            |             |         |
| Antipsychotic<br>(aripiprazole,<br>olanzapine,<br>quetiapine,<br>risperidone) |         |          |       |            |             |               |              |     |               |           | VA      |           |                        |      |             |          |     | VA            | VA           | VA         | VA         | VA          | VA      |
